# Supplementary material for: Immunoassay for quantification of antigen-specific IgG fucosylation
Source: PubMed Central journal article supplement — eBioMedicine. 2022 Jun 22;81:104109. doi: 10.1016/j.ebiom.2022.104109 (PMC9240806; doi:10.1016/j.ebiom.2022.104109), 2022-06-22
Supplement: mmc2.pdf [file mmc2.pdf]

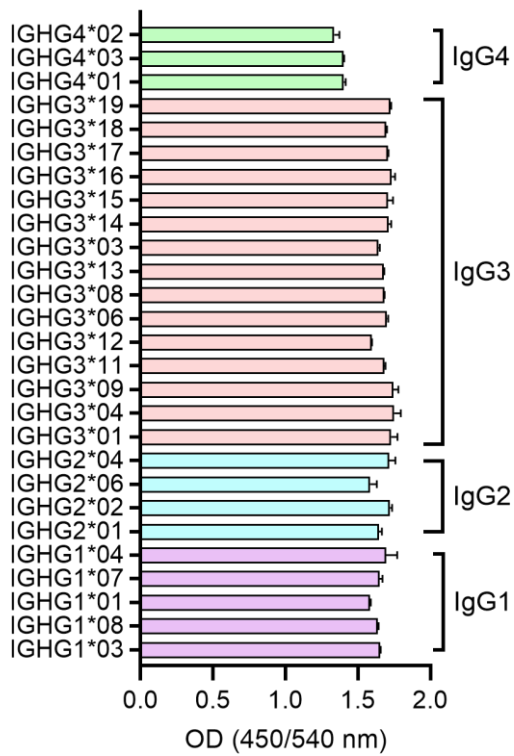

**Figure S1. Sensitivity of the anti-IgG secondary antibody (used in the IgG ELISA) to allotypes of all four IgG subclasses.** The allotypes used were described previously by de Taeye et al. *Front. Immunol.* 2020 (ref. 42). Error bars represent standard deviation of two measurements.

**a**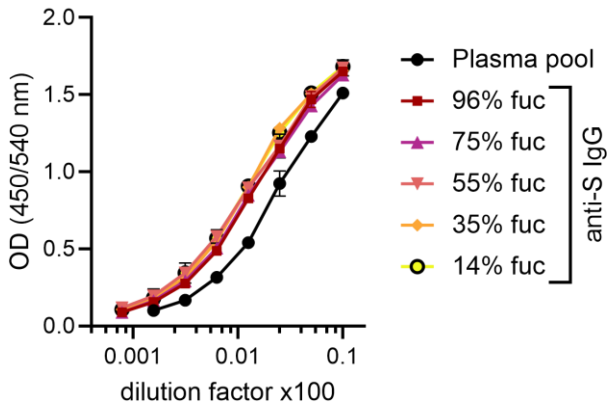**b**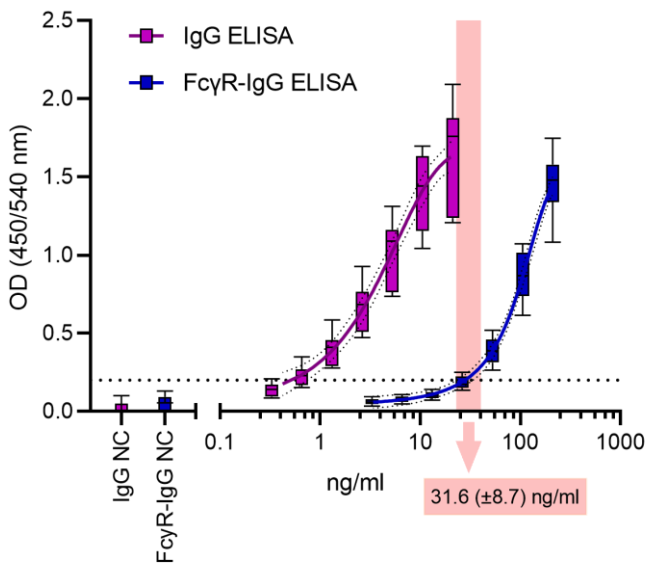

**Figure S2. Sensitivity of the FEASI assay. a.** Titrations of the anti-S recombinant IgG variants and their mixes with the plasma pool that was used as calibrator in this study. Two-fold dilutions are shown starting at 40 ng/ml for glycoengineered recombinant IgG and 1:1000 for the plasma pool. Error bars represent standard deviation of three measurements. **b.** Negative control (NC) samples were measured in the IgG and the FcγR-IgG ELISA. The horizontal dotted line represents the lower limit of detection, which was set three standard deviations above the mean of the NC samples in the FcγR-IgG ELISA. Shown is the titration of the COVID-19 plasma pool with both the IgG and the FcγR-IgG ELISA. Box and whiskers plot represent data from 12 independent experiments.

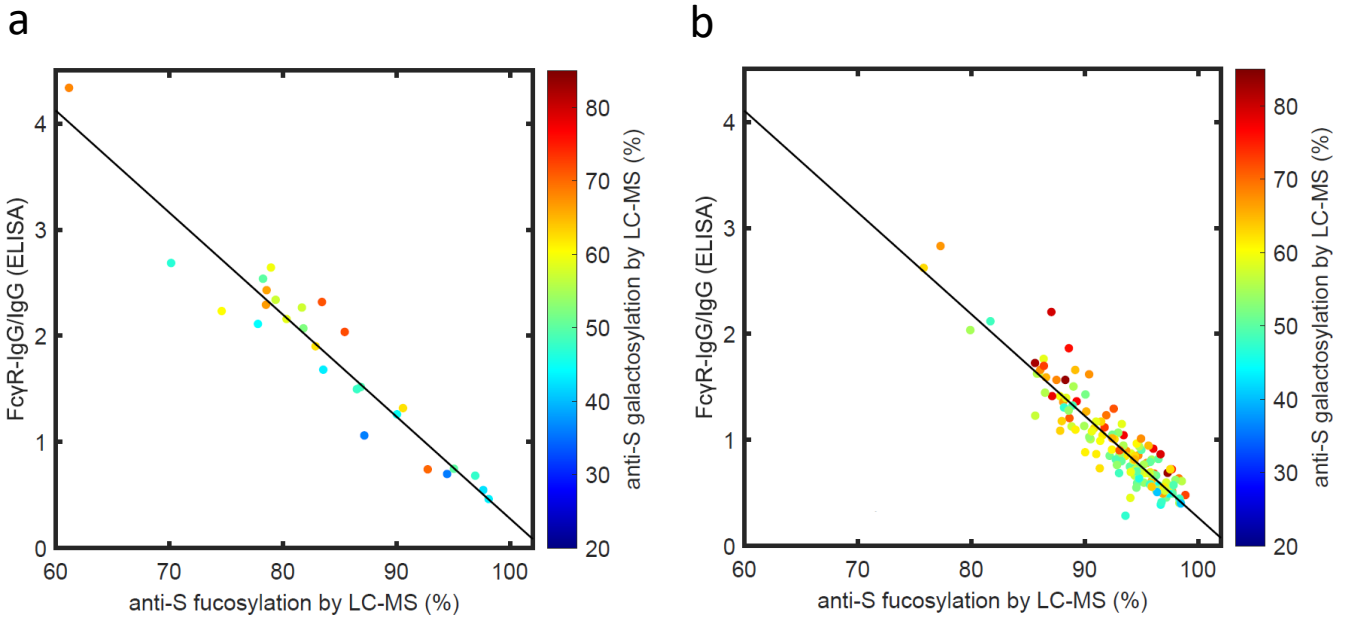

**Figure S3. Influence of galactosylation on FEASI ratio.** **a**, Linear regression model for the ratio of the FcγR-IgG and the IgG ELISA done on plasma from COVID-19 ICU patients (n=27) and **b**, convalescent blood donors (n=145) compared to anti-S IgG Fc fucosylation percentage as determined by LC-MS. Red and orange colors indicate samples with high galactose (>60%), according to the indicated color scale.

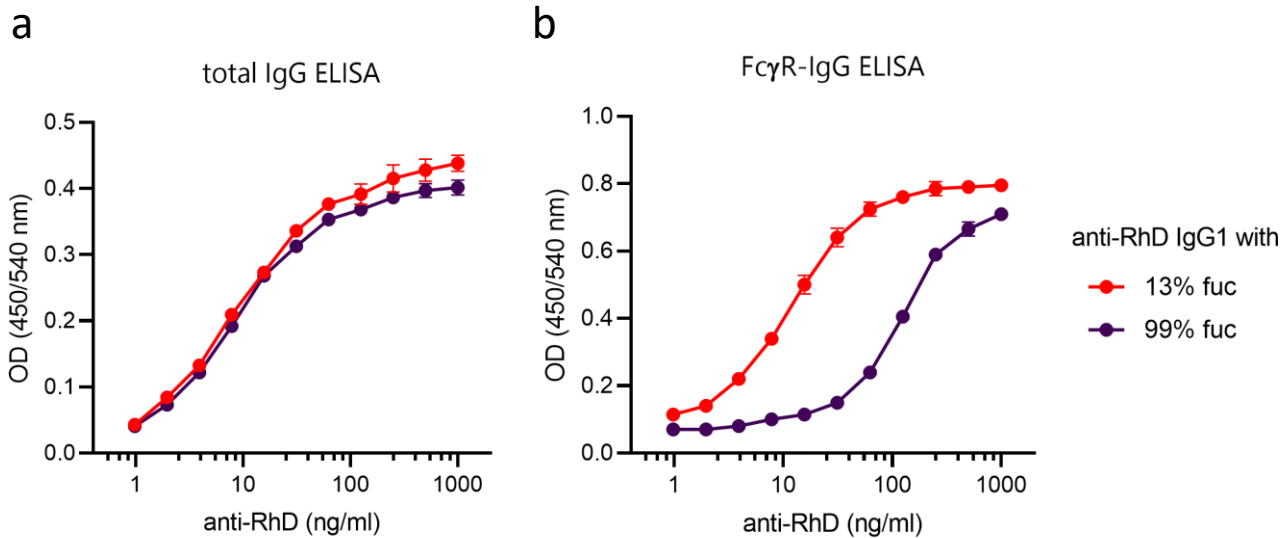

**Figure S4. Total IgG Fc fucoylation analysis by dual ELISA approach.** **a**, Recombinant anti-RhD monoclonal IgG1 antibody glycoengineered to contain high and low levels of fucose probed with the anti-IgG, and **b**, the Fc $\gamma$ R-IgG ELISA. Error bars represent standard deviation of three measurements.
